# Supplementary material for: The Impact of Marijuana on Antidepressant Treatment in Adolescents: Clinical and Pharmacologic Considerations
Source: MDPI journal article supplement (doi:10.3390/jpm11070615), 2021-06-29
Supplement: s1 [file s1]

| Adverse.Events<br>Drug Label<br>Unique.Patients | Sertraline_Frequency<br>Sertraline_Frequency | Sertraline_label<br>Sertraline_label |
|-------------------------------------------------|----------------------------------------------|--------------------------------------|
| <i>fatigue***</i>                               | >10% Frequency                               | 1                                    |
| <i>diarrhoea***</i>                             | >10% Frequency                               | 1                                    |
| <i>dizziness***</i>                             | >10% Frequency                               | 1                                    |
| <i>cough***</i>                                 | 0                                            | 0                                    |
| <i>headache</i>                                 | 0                                            | 0                                    |
| <i>somnolence</i>                               | >10% Frequency                               | 1                                    |
| <i>constipation</i>                             | 5% to 9% Frequency                           | 1                                    |
| <i>hyperhidrosis</i>                            | 5% to 9% Frequency                           | 1                                    |
| <i>insomnia</i>                                 | >10% Frequency                               | 1                                    |
| <i>decreased appetite</i>                       | 5% to 9% Frequency                           | 1                                    |
| <i>influenza*</i>                               | 0                                            | 0                                    |
| <i>abdominal pain</i>                           | 5% to 9% Frequency                           | 1                                    |
| <i>weight decreased</i>                         | 5% to 9% Frequency                           | 1                                    |
| <i>abdominal pain upper</i>                     | 5% to 9% Frequency                           | 1                                    |
| <i>paraesthesia</i>                             | 0                                            | 0                                    |
| <i>libido decreased</i>                         | 5% to 9% Frequency                           | 1                                    |
| <i>dry mouth</i>                                | 0                                            | 0                                    |
| <i>dyspepsia</i>                                | 5% to 9% Frequency                           | 1                                    |
| <i>anorgasmia</i>                               | 0                                            | 0                                    |
| <i>agitation</i>                                | 5% to 9% Frequency                           | 1                                    |
| <i>sexual dysfunction</i>                       | 1% to 4% frequency                           | 1                                    |
| <i>weight increased***</i>                      | 5% to 9% Frequency                           | 1                                    |
| <i>rhinitis</i>                                 | 0                                            | 0                                    |

| Escitalopram_frequency | Escitalopram_label | Absolute Counts |
|------------------------|--------------------|-----------------|
| Escitalopram_frequency | Escitalopram_label | CYP2C19 w/o CBD |
|                        |                    | <b>427,932</b>  |
| 5% to 9% Frequency     | 1                  | 27,457          |
| >10% Frequency         | 1                  | 20,421          |
| 5% to 9% Frequency     | 1                  | 20,213          |
| 5% to 9% Frequency     | 1                  | 7,978           |
| >10% Frequency         | 1                  | 21,727          |
| >10% Frequency         | 1                  | 10,977          |
| 5% to 9% Frequency     | 1                  | 8,115           |
|                        | 0                  | 7,439           |
| >10% Frequency         | 1                  | 14,603          |
| 1% to 4% frequency     | 1                  | 9,647           |
| 5% to 9% Frequency     | 1                  | 3,196           |
| 1% to 4% frequency     | 1                  | 9,081           |
|                        | 0                  | 11,273          |
| 1% to 4% frequency     | 1                  | 6,533           |
| 1% to 4% frequency     | 1                  | 7,218           |
| 5% to 9% Frequency     | 1                  | 1,073           |
| 5% to 9% Frequency     | 1                  | 3,874           |
| 5% to 9% Frequency     | 1                  | 3,842           |
| 5% to 9% Frequency     | 1                  | 532             |
|                        | 0                  | 6,572           |
| >10% Frequency         | 1                  | 992             |
|                        | 0                  | 10,830          |
| 5% to 9% Frequency     | 1                  | 395             |

| Absolute Counts<br>CBD w/o CYP2C19 | Absolute Counts<br>CBD + CYP2C19 |  | CYP2C19 w/o CBD<br>Freq.CYP2C19 w/o CBD | CBD w/o CYP2C19<br>Freq.CBD w/o CYP2C19 |
|------------------------------------|----------------------------------|--|-----------------------------------------|-----------------------------------------|
| 7,008                              | 421                              |  | 427,932                                 | 7,008                                   |
| 509                                | 89                               |  | 6.42                                    | 7.26                                    |
| 676                                | 67                               |  | 4.77                                    | 9.65                                    |
| 168                                | 57                               |  | 4.72                                    | 2.40                                    |
| 114                                | 39                               |  | 1.86                                    | 1.63                                    |
| 200                                | 23                               |  | 5.08                                    | 2.85                                    |
| 540                                | 14                               |  | 2.57                                    | 7.71                                    |
| 155                                | 14                               |  | 1.90                                    | 2.21                                    |
| 38                                 | 12                               |  | 1.74                                    | 0.54                                    |
| 204                                | 8                                |  | 3.41                                    | 2.91                                    |
| 260                                | 8                                |  | 2.25                                    | 3.71                                    |
| 76                                 | 8                                |  | 0.75                                    | 1.08                                    |
| 58                                 | 7                                |  | 2.12                                    | 0.83                                    |
| 188                                | 6                                |  | 2.63                                    | 2.68                                    |
| 92                                 | 4                                |  | 1.53                                    | 1.31                                    |
| 57                                 | 3                                |  | 1.69                                    | 0.81                                    |
| 3                                  | 2                                |  | 0.25                                    | 0.04                                    |
| 23                                 | 2                                |  | 0.91                                    | 0.33                                    |
| 38                                 | 2                                |  | 0.90                                    | 0.54                                    |
|                                    | 1                                |  | 0.12                                    | 0.00                                    |
| 96                                 | 1                                |  | 1.54                                    | 1.37                                    |
| 4                                  | 1                                |  | 0.23                                    | 0.06                                    |
| 152                                | 1                                |  | 2.53                                    | 2.17                                    |
| 4                                  | 1                                |  | 0.09                                    | 0.06                                    |

| CBD + CYP2C19      |             | FDR p    |
|--------------------|-------------|----------|
| Freq.CBD + CYP2C19 |             | FDR p    |
| 421                | Fold-change |          |
| 21.14              | 3.29        | < 0.005  |
| 15.91              | 3.33        | < 0.005  |
| 13.54              | 2.87        | < 0.005  |
| 9.26               | 4.97        | < 0.005  |
| 5.46               | 1.08        | 0.772364 |
| 3.33               | 1.30        | 0.499231 |
| 3.33               | 1.75        | 0.093158 |
| 2.85               | 1.64        | 0.1888   |
| 1.90               | 0.56        | 0.196667 |
| 1.90               | 0.84        | 0.703462 |
| 1.90               | 2.54        | 0.036875 |
| 1.66               | 0.78        | 0.668667 |
| 1.43               | 0.54        | 0.244138 |
| 0.95               | 0.62        | 0.499231 |
| 0.71               | 0.42        | 0.244138 |
| 0.48               | 1.89        | 0.505714 |
| 0.48               | 0.52        | 0.505714 |
| 0.48               | 0.53        | 0.505714 |
| 0.24               | 1.91        | 0.668667 |
| 0.24               | 0.15        | 0.093158 |
| 0.24               | 1.02        | 0.98     |
| 0.24               | 0.09        | < 0.005  |
| 0.24               | 2.57        | 0.499231 |
